# Supplementary material for: High Rates of Biomarker-Confirmed Alcohol Use Among Pregnant Women Living With HIV in South Africa and Uganda
Source: PubMed Central journal article supplement (PMC6857734; doi:10.1097/qai.0000000000002156), 2019-09-18
Supplement: NIHMS1539091-supplement-1.pdf [file NIHMS1539091-supplement-1.pdf]

| Supplementary Table. Multivariate analyses testing depression as a correlate of any alcohol use and pregnancy as a moderator of this relationship, stratified by study site (N = 418)* |                         |         |                                      |                        |                         |             |                                      |                 |
|----------------------------------------------------------------------------------------------------------------------------------------------------------------------------------------|-------------------------|---------|--------------------------------------|------------------------|-------------------------|-------------|--------------------------------------|-----------------|
|                                                                                                                                                                                        | Uganda (n = 225)        |         |                                      |                        | South Africa (n = 193)  |             |                                      |                 |
|                                                                                                                                                                                        | Adjusted OR<br>(95% CI) | p-value | Adjusted OR <sup>×</sup><br>(95% CI) | p-value                | Adjusted OR<br>(95% CI) | p-value     | Adjusted OR <sup>×</sup><br>(95% CI) | p-value         |
| Depression (Hopkins) <sup>×</sup>                                                                                                                                                      | 1.19 (0.74, 1.89)       | 0.47    | -                                    |                        | 1.79 (1.06, 3.01)       | <b>0.03</b> | -                                    |                 |
| Pregnancy status                                                                                                                                                                       |                         | 0.83    |                                      |                        |                         | 0.18        |                                      |                 |
| Not pregnant women                                                                                                                                                                     | 1.00                    |         | -                                    |                        | 1.00                    |             | -                                    |                 |
| Pregnant women                                                                                                                                                                         | 0.94 (0.50, 1.75)       |         | -                                    |                        | 0.62 (0.31, 1.24)       |             | -                                    |                 |
| Pregnancy + depression <sup>×</sup>                                                                                                                                                    |                         |         |                                      | intxn<br><b>p=0.04</b> |                         |             |                                      | intxn<br>p=0.91 |
| Depression (Δ+1 point), not pregnant                                                                                                                                                   | -                       |         | 0.80 (0.44, 1.47)                    | 0.48                   | -                       |             | 1.83 (0.96, 3.49)                    | 0.07            |
| Depression (Δ+1 point), pregnant                                                                                                                                                       | -                       |         | 2.25 (1.02, 4.94)                    | 0.04                   | -                       |             | 1.72 (0.72, 4.10)                    | 0.22            |
| Age (per year)                                                                                                                                                                         | 1.00 (0.96, 1.03)       | 0.90    | 1.00 (0.97, 1.04)                    | 0.93                   | 0.95 (0.92, 0.99)       | <b>0.01</b> | 0.95 (0.92, 0.99)                    | <b>0.01</b>     |
| Marital status                                                                                                                                                                         |                         | 0.50    |                                      | 0.43                   |                         | 0.51        |                                      | 0.51            |
| Married/cohabitating                                                                                                                                                                   | 1.00                    |         | 1.00                                 |                        | 1.00                    |             | 1.00                                 |                 |
| Not married                                                                                                                                                                            | 1.23 (0.67, 2.27)       |         | 1.28 (0.69, 2.37)                    |                        | 1.26 (0.63, 2.51)       |             | 1.26 (0.63, 2.51)                    |                 |
| Education                                                                                                                                                                              |                         | 0.20    |                                      | 0.26                   |                         | 0.05        |                                      | 0.05            |
| Less than primary school                                                                                                                                                               | 1.00                    |         | 1.00                                 |                        | 1.00                    |             | 1.00                                 |                 |
| Primary school or more                                                                                                                                                                 | 0.69 (0.39, 1.22)       |         | 0.71 (0.40, 1.28)                    |                        | 0.35 (0.12, 1.01)       |             | 0.35 (0.12, 1.01)                    |                 |

\*Any alcohol use defined as AUDIT-C >0 and/or PEth ≥8 ng/ml

<sup>×</sup> Hopkins depression measure was used as continuous variable

Definitions: AUDIT-C = Alcohol Use Disorders Identification Test – Consumption; PEth = phosphatidylethanol
